# Supplementary material
Source: PubMed Central journal article supplement (PMC16878)
Supplement: pnas_97_17_9413__2.pdf [file pnas_97_17_9413__2.pdf]

50 60 70 80 90 100 110

DLHD\_HAEI ALAVVFPGLSLLLELWRVVKACV--TADKILLMQAANTGLT-EGSTPENGNDYDRDVIISLTLR-LDKLHVLGKGE

LDHD\_HAEI ALAVVVRPATLLEFWNI>VKVCV--EHDVIVINOAAANTGLT-**G**GS**T**PDGNDYDRDI>VVIN**T**MR-I**D**GI**Q**LI**N**NAS

ADAS\_CAVP PDI>VLWP**T**CHDD**V**VKI>VNLAC--KYNLCI**P**I**P**GGGT**S**V**S**Y**G**LMCP**A**DE**T**R--**T**I**I**S**L**D**T**S**Q**-**M**N**R**I**L**W**V**D**E**N**N**

AIP2\_YEAS SKL>VLR**P**KS**V**E**K**V**S**L**I**L**N**Y**C**N--DE**K**I**A**V**V**P**Q**GG**T**GL**V**-**G**GS**V**P**I**F--**D**E**L**I**L**S**L**A**N**-**L**N**K**I**R**D**F**D**P**V**S**

GLCD\_ECOL PLL>VV**L**P**K**Q**M**E**Q**V**T**A**I**L**A**V**C**H--R**L**R**V**P**V**V**T**R**G**A**G**T**G**L**S**-**G**A**L**P**L**E**K**G--**V**L**L**V**M**A**R**-**F**K**E**I**L**D**I**N**P**V**G**

YEH1\_YEAS SNL**I**L**L**P**N**S**T**D**K**V**S**K**I**M**K**Y**C**N--D**K**K**L**A**V**V**P****Q**GG**T**D**L**V-**G**A**S**V**P**V**F**--**D**E**I**V**L**S**L**R**N**-**M**N**K**V**R**D**F**D**P**V**S**

DLDI\_YEAS FRI**I**L**F**P**H**T**T**E**E**V**S**K**I**L**K**I**C**H--D**N**M**P**V**V**P**F**S**G**G**T**S**L**E-**G**H**F**L**P**T**R**I--**G**D**T**I**T**V**D**L**S**K-**M**N**N**V**V**K**F**D**K**L**D**

YDIJ\_ECOL PDA>VV**F**P**R**S**T**A**D**V**A**L**I**A**R**L**A**--R**Y**S**L**I**F**T**P**R**G**G**T**G**T**N-**Q**A**L**N**Q**G--**I**V**D**M**S**R-**M**N**R**I**E**I**N**E**G**

DLDI\_KLUL PEI>V**L**Y**P**R**N**T**E**D**V**S**K**L**L**K**I**C**H**--**K**Y**S**I**P**V**I**P**R**S**G**G**T**S**L**E-**G**H**F**L**P**T**R**P--**G**S**C**V**L**D**I**S**K**-**L**N**K**I**I**Q**L**N**K**E**D**

YGCU\_ECOL PAA>V**V**K**L**G**S**T**E**Q**V**S**R**V**L**N**F**M**N**--**A**H**K**I**N**G**V**P**R**T**G**A**S**A**T**E**G**-**L**E**T**V**V**E**N**--**S**V**V**L**D**G**S**A-**M**N**Q**I**I**N**I**D**E**N**M**

YDIJ\_HAEI PQA>I**L**F**P**K**T**V**A**D**I**V**R**I**T**K**L**A**N**L**P**E**Y**Q**S**I**S**F**T**P**R**G**G**T**G**T**N**-**Q**S**T**N**N**--**I**V**D**L**S**R**H**M**T**A**I**L**L**E**N**K**E**R

VAOX\_PENS ASA>I>V**A**P**R**N**V**A**D**V**Q**S**L**V**G**L**A**N--**K**F**S**F**P**L**W**P**I**S**G**R**N**S**G**V-**G**A**A**P**R**V**S**G--**S**V**V**L**D**M**G**K-**M**N**R**V**L**E**V**N**V**E**G**

FAS5\_RHOF PPV>VV**V**P**R**T**V**A**D**V**Q**E**A**L**R**Y**T**A--**A**R**N**L**S**L**A**V**R**S**G**H**S**T**Y**-**Q**Q**C**A**D**G--**G**V**V**L**D**M**K**R-**F**N**T**V**H**D**V**R**S**-**G**

HDNO\_ARTOX PSL**I**A**R**C**L**S**A**G**D**V**A**K**S**V**R**Y**A**C--**D**N**G**L**E**I**S**V**R**S**G**H**N**P**N**-**G**A**T**N**D**G--**G**I**V**L**D**L**R**L-**M**N**S**I**H**I**D**T**A**G**S**

GGLO\_RAT P--**P**T**S**V**E**V**R**E**V**L**A**L**A**R--**E**Q**K**K**V**K**V**V**G**G**H**S**P**S-**D**I**A**C**T**D**G**--**F**M**I**H**M**G**K**-**M**N**R**V**L**Q**V**D**K**E**K**

MCRA\_STRL P**A**Y**V**V**E**A**A**D**E**Q**E**V**A**A**V**R**L**A**A**--**E**Q**K**R**P**V**G**V**M**A**T**H**G**H**P**S-**V**S**A**D**D**A--**F**L**V**N**T**R**R**-**M**E**G**V**S**V**D**A**A**R**A**

RETO\_ESCCA PS**A**I**I**L**P**S**G**S**K**E**L**S**N**T**I**R**C**I**R**--**K**G**S**W**T**I**R**L**R**S**G**H**S**Y**E**-**G**L**S**Y**T**S**D**T**P**--**F**I**L**I**D**L**M**N-**L**N**R**V**S**I**D**L**E**S**E**

ALO\_YEAS P--**S**S**I**D**E**V**V**E**L**V**K**S**A**R--**L**A**E**K**S**L**V**T**V**G**S**H**S**P**S**-**N**M**C**V**T**D**E**--**W**L**V**N**L**D**R**-**L**D**K**V**Q**K**F**V**E**Y**A**

DIMH\_CAEE P--**S**S**I**D**E**V**V**E**L**V**K**S**A**R--**L**A**E**K**S**L**V**T**V**G**S**H**S**P**S**-**N**M**C**V**T**D**E**--**W**L**V**N**L**D**R**-**L**D**K**V**Q**K**F**V**E**Y**A**

GLCE\_ECOL P--**S**S**I**D**E**V**V**E**L**V**K**S**A**R--**L**A**E**K**S**L**V**T**V**G**S**H**S**P**S**-**N**M**C**V**T**D**E**--**W**L**V**N**L**D**R**-**L**D**K**V**Q**K**F**V**E**Y**A**

MURB\_BACSU AD**V**L**V**I**P**S**S**V**D**A**V**K**D**I**M**D**V**I**K**--**K**Y**D**V**K**W**T**V**I**G**R**G**S**N**L**L**V**L**D**E**G**I**R**G--**V**I**K**L**G**A**G**L**D**H**L**E**L**E**G**E--

GI4808508 PS**A**A**V**T**A**T**T**V**E**Q**V**Q**G**V**V**K**I**C**N**--**E**H**K**I**P**I**T**I**S**T**G**R**N**F**G**Y-**G**S**A**A**P**V**Q**R**G**--**Q**V**I**L**D**L**K**K-**M**N**K**I**I**K**I**D**E**M**C**

120 130 140 150 160 170

DLHD\_HAEI QVLA**Y**P**G**T**T**L**Y**S**L**E**K**A**L**K**P**L**G**R--EPHSVIGSSCIGASVIGGICNNSGGLSVQRGPAYTE

LDHD\_HAEI Q**V**I**C**L**P****G**S**T**L**N**E**L**E**N**Q**L**K**P**F**G**R--EPHSVIGSSCIGASVIGGICNNSGGLSVQRGPAYTE

ADAS\_CAVP L**T**A**V**E**A**G**I**T**G**Q**E**L**E**R**Q**L**K**E**S**G**Y**--**C**T**G**H**E**P**D**-**S**L**E**F**S**T**V**G**G**W**I**S**T**R**A**S**G**M**K**K**N**I--**Y**G**N**

AIP2\_YEAS G**L**I**C**D**A**G**V**I**L**E**N**A**N**N**Y**V**M**E**Q**N**Y**--**M**F**P**L**D**L**G**A**K**G**S**-**C**H**Y**G**G**V**V**A**T**N**A**G**L**R**L**L**R**--**Y**G**S**

GLCD\_ECOL R**A**R**V**Q**P**G**V**R**N**L**A**I**S**Q**A**V**A**P**H**N**L**--**Y**Y**A**P**D**P**S**-**S**Q**I**A**C**S**I**G**G**N**V**A**E**N**A**G**G**V**H**C**L**K--**Y**G-

YEH1\_YEAS G**T**K**C**D**A**G**V**V**M**R**D**A**H**Q**F**L**H**D**H**D--**I**F**P**L**D**L**P**S**R**N**N**-**C**Q**V**G**G**V**V**S**T**N**A**G**L**N**F**L**R**--**Y**G**N**

DLDI\_YEAS L**I**T**V**Q**A**G**L**P**W**E**D**L**N**D**Y**L**S**D**H**G**L**--**M**F**G**C**D**P**G**-**P**G--**A**Q**I**G**G**C**I**A**N**S**C**S**G**T**N**A**Y**R--**Y**G**T**

YDIJ\_ECOL W**V**R**V**E**A**G**V**I**K**D**Q**L**N**Q**Y**L**K**P**F**G**Y**--**F**F**A**P**E**L**S**T**S**N**R**-**A**T**L**G**G**M**I**N**T**D**A**S**Q**G**S**L**V**--**Y**G**K**

DLDI\_KLUL L**V**V**V**Q**G**G**V**P**W**E**E**L**N**E**Y**L**N**D**H**G**L**--**L**F**G**C**D**P**G**-**P**G--**A**Q**I**A**G**C**I**A**N**S**C**S**G**T**N**A**Y**R--**Y**G**T**

YGCU\_ECOL Q**A**T**A**Q**C**G**V**P**L**E**V**L**E**N**A**L**R**E**K**G**Y**--**T**T**G**H**S**P**Q**-**S**K**P**L**A**Q**M**G**L**V**A**T**R**S**I**G**Q**F**S**T**Y**G-**A**I**E**D

YDIJ\_HAEI W**V**R**V**Q**A**G**V**V**K**D**Q**L**N**Q**F**L**K**P**H**G**L**--**F**F**A**P**E**L**S**T**S**N**R**-**A**T**L**G**G**M**I**N**T**D**A**S**Q**Q**S**L**Q**--**Y**G**K**

VAOX\_PENS Y**C**V**V**E**P**G**V**T**Y**H**D**L**H**N**Y**L**E**A**N**N**L**R**D**K**L**W**L**D**P**D**L**G**G**--**G**S**V**L**G**N**A**V**E**R**G**V**G**T**P**Y**G**--**D**M

FAS5\_RHOF Q**A**T**I**D**A**G**V**R**W**S**D**V**V**A**A**T**L**S**R**Q**T**--**P**P**V**L**T**-**D**Y**L**G--**T**T**V**G**G**T**S**V**G**G**F**G--**D**M

HDNO\_ARTOX R**A**R**I**G**G**G**V**I**S**G**D**L**V**K**E**A**A**K**F**G**L**A**A**V**T**G**M**H**P**K--**V**G**F**C**L**A**L**N**G**G**V**G**F**L**T**P**K**--**Y**G-

GGLO\_RAT Q**I**T**V**E**A**G**I**L**L**A**D**L**H**P**Q**L**D**E**H**G**L**--**A**M**S**N**L**G**A**V**S**D--**V**T**V**A**G**V**I**G**S**G**T**H**N**T**G**I**K**H--**G**I

MCRA\_STRL T**A**W**I**E**A**G**A**R**W**R**K**V**L**E**H**T**A**P**H**G**L**A**P**L**N**G**S**P**N**--**V**G**A**V**Y**L**V**G**G**A**G**L**L**G**R**R**G**Y**A**A**D**H

RETO\_ESCCA T**A**W**V**E**S**G**S**T**L**G**E**L**Y**Y**A**I**T**E**S**S--**K**L**G**F**T**A**G**--**W**C**P**T**G**G**H**I**S**G**G**G**F**G**M**M**S**R**G**-**L**A**A**D**N**

ALO\_YEAS D**V**T**V**D**A**G**M**R**L**Y**Q**L**N**E**F**L**G**A**K**G**Y**--**S**I**Q**N**L**G**S**I**S**E--**Q**S**V**A**G**I**S**T**G**S**H**G**S**S**P**Y**G**-**L**I**S**S**Q**

DIMH\_CAEE M**T**V**A**E**P**G**V**T**M**G**Q**L**S**Q**Y**L**I**S**R**G**Y**--**T**L**P**V**L**P**E**L**D**D--**L**T**V**G**G**L**I**N**G**C**G**V**E**S**G**S**F**K--**Y**G**M**

GLCE\_ECOL L**V**I**A**R**V**G**T**P**L**V**T**I**E**A**A**L**E**S**A**G**O**--**M**L**P**C**E**P**P**H**Y**G-**E**A**T**W**G**G**M**V**A**C**L**A**G**A**P**R**R**P**W**--**S**G**S**

MURB\_BACSU Q**V**T**V**G**G**G**Y**S**V**V**R**L**A**T**S**L**S**K**K**G**L**S--**G**L**E**F**A**A**G**I**P**G--**S**V**G**A**V**M**N**A**G**--**S**G**S**

GI4808508 Y**A**L**V**E**P**G**V**T**F**G**Q**M**Y**D**I**Q**E**N**N**L--**P**V**M**L**S**F**S**A**P**S**A**I**A**G**P**V**G****N**T**M**D**R**G**V**G--**S**G**S**
